# Supplementary material
Source: PubMed Central journal article supplement (PMC4834912)
Supplement: NIHMS776107-supplement-supplement_table_1.pdf [file NIHMS776107-supplement-supplement_table_1.pdf]

# **Positive Association between Plasma Amylin and Cognition in a Homebound Elderly Population**

Wei Qiao Qiu<sup>1,2,6\*</sup>, Rhoda Au<sup>3,6</sup>; Haihao Zhu<sup>2</sup>, Max Wallack<sup>2</sup>, Elizabeth Liebson<sup>7</sup>,  
Huajie Li<sup>2,9</sup>, James Rosenzweig<sup>4</sup>, Mkaya Mwamburi<sup>8</sup> and Robert A. Stern<sup>3,5,6</sup>

<sup>1</sup> Departments of Psychiatry, <sup>2</sup>Pharmacology & Experimental Therapeutics, <sup>3</sup>Neurology,  
<sup>4</sup>Medicine and <sup>5</sup>Neurosurgery, <sup>6</sup>Alzheimer's Disease Center, Boston University School of  
Medicine; <sup>7</sup>McLean Hospital, Harvard Medical School; <sup>8</sup>Department of Public Health and  
Family Medicine, Tufts University; <sup>9</sup>Department of Neurology, the First People's Hospital of  
Chang Zhou, China

\*Correspondence:

Wendy Wei Qiao Qiu, M.D., Ph.D.

Boston University School of Medicine

72 East Concord Street, R-623D

Boston, MA 02118

Tel: 617-638-4336; fax: 617-638-5254; email: wqiu67@bu.edu

**Supplement Table: No association between plasma A $\beta$  or insulin and cognitive tests in multivariate regression analyses**

| Outcomes                  | Log <sub>10</sub> A $\beta$ | Log <sub>10</sub> A $\beta$ 1-42<br>Adjusting for age, gender,<br>ethnicity, school and ApoE4 |         | Log <sub>10</sub> A $\beta$ 1-40<br>Adjusting for age, gender,<br>ethnicity, school and ApoE4 |         | Log <sub>10</sub> Insulin<br>Adjusting for age, gender,<br>ethnicity, school and ApoE4 |         |
|---------------------------|-----------------------------|-----------------------------------------------------------------------------------------------|---------|-----------------------------------------------------------------------------------------------|---------|----------------------------------------------------------------------------------------|---------|
|                           |                             | Estimate $\beta$ (SE)                                                                         | p value | Estimate $\beta$ (SE)                                                                         | p value | Estimate $\beta$ (SE)                                                                  | p value |
| <b>MMSE Scores</b>        |                             | + 0.221 (0.113)                                                                               | 0.05    | + 0.024 (0.170)                                                                               | 0.89    | - 0.051 (0.123)                                                                        | 0.68    |
| <b>Verbal fluency</b>     |                             | - 0.072 (0.419)                                                                               | 0.86    | - 0.807 (0.632)                                                                               | 0.20    | - 0.167 (0.453)                                                                        | 0.71    |
| <b>Digit span</b>         |                             | - 0.011 (0.124)                                                                               | 0.93    | - 0.291 (0.187)                                                                               | 0.12    | - 0.171 (0.135)                                                                        | 0.21    |
| <b>WLL delayed recall</b> |                             | - 0.104 (0.095)                                                                               | 0.27    | - 0.104 (0.143)                                                                               | 0.47    | + 0.075 (0.103)                                                                        | 0.47    |
| <b>LM delayed recall</b>  |                             | + 0.404 (0.324)                                                                               | 0.21    | + 0.691 (0.487)                                                                               | 0.16    | + 0.514 (0.353)                                                                        | 0.12    |
| <b>Trailmaking A</b>      |                             | - 1.845 (2.069)                                                                               | 0.37    | - 2.179 (3.081)                                                                               | 0.68    | - 3.229 (2.232)                                                                        | 0.15    |
| <b>Trailmaking B</b>      |                             | - 4.179 (2.737)                                                                               | 0.13    | - 0.733 (4.077)                                                                               | 0.86    | - 0.724 (2.945)                                                                        | 0.81    |
| <b>Block design</b>       |                             | + 0.551 (0.300)                                                                               | 0.07    | + 0.517 (0.459)                                                                               | 0.26    | + 0.324 (0.332)                                                                        | 0.33    |

Plasma A $\beta$ 1-42 (Log<sub>10</sub> A $\beta$ 1-42), A $\beta$ 1-40 (Log<sub>10</sub> A $\beta$ 1-40) and insulin (Log<sub>10</sub> Insulin) were all transformed to log<sub>10</sub> as a determining factor in each model. The lipid profile includes cholesterol, LDL and HDL. MMSE = Mini Mental State Exam; WLL = Word learning list; LM = Logical memory
